# Supplementary material for: Control of cardiovascular risk factors and its determinants in the general population– findings from the STAAB cohort study
Source: PubMed Central journal article supplement (PMC5669014; doi:10.1186/s12872-017-0708-x), 2017-11-02
Supplement: 12872_2017_708_MOESM1_ESM.pdf [file 12872_2017_708_MOESM1_ESM.pdf]

**Table 4: Definition of uncontrolled risk factors**

| <b>Uncontrolled risk factor</b>                  | <b>Definition</b>                                                                                    |
|--------------------------------------------------|------------------------------------------------------------------------------------------------------|
| <b><i>Blood Pressure</i></b>                     |                                                                                                      |
| High BP level despite medication                 | ≥140/90 mmHg & antihypertensive medication                                                           |
| High BP level despite medication in diabetics    |                                                                                                      |
| Type 1                                           | ≥140/85 mmHg & antihypertensive medication & self-reported type 1 diabetes & antidiabetic medication |
| Type 2                                           | ≥130/80 mmHg & antihypertensive medication & self-reported type 2 diabetes & antidiabetic medication |
| <b><i>Glycemic control</i></b>                   |                                                                                                      |
| HbA1c ≥ 7% despite medication                    | HbA1c ≥7% & antidiabetic medication                                                                  |
| <b><i>LDL cholesterol</i></b>                    |                                                                                                      |
| High LDL-C level despite medication              | ≥115 mg/dl & lipid-lowering agent                                                                    |
| High LDL-C level despite medication in diabetics | ≥100 mg/dl & lipid-lowering agent & antidiabetic medication                                          |
| <b><i>Tabacco use</i></b>                        | Self-reported in an structured interview                                                             |
| <b><i>Physically inactive</i></b>                | <150 min/week moderate activity or < 75 min/week strenuous activity                                  |
| <b><i>Overweight</i></b>                         |                                                                                                      |
| Despite physically activity                      | Body mass index >25 kg/m <sup>2</sup> & physically active                                            |
