# Supplementary material for: Control of cardiovascular risk factors and its determinants in the general population– findings from the STAAB cohort study
Source: PubMed Central journal article supplement (PMC5669014; doi:10.1186/s12872-017-0708-x), 2017-11-02
Supplement: 12872_2017_708_MOESM2_ESM.pdf [file 12872_2017_708_MOESM2_ESM.pdf]

**Table 5: Sensitivity analysis according to sex**

| Variables                        | Female             |         | Male              |         |
|----------------------------------|--------------------|---------|-------------------|---------|
|                                  | OR (95%-KI)        | p-value | OR (95%-KI)       | p-value |
| <b>Age groups in years</b>       |                    | < 0.001 |                   | 0.04    |
| 30-39                            | 1                  |         | 1                 |         |
| 40-49                            | 1.48 (0.52; 4.12)  |         | 2.09 (1.06; 4.12) |         |
| 50-59                            | 3.81 (1.37; 10.58) |         | 1.43 (0.70; 2.93) |         |
| 60-69                            | 4.73 (1.66; 13.47) |         | 2.52 (1.25; 5.10) |         |
| 70-79                            | 8.04 (2.27; 28.53) |         | 2.65 (1.08; 6.63) |         |
| <b>Highest education in year</b> |                    | <0.01   |                   | 0.06    |
| Tertiary                         | 1                  |         | 1                 |         |
| Secondary                        | 1.20 (0.70; 2.08)  |         | 1.45 (0.90; 2.35) |         |
| Primary                          | 2.68 (1.45; 4.96)  |         | 1.71 (1.07; 2.75) |         |
| <b>Marital Status*</b>           |                    | 0.604   |                   | 0.21    |
| Married                          | 1                  |         | 1                 |         |
| Single                           | 0.64 (0.32; 1.28)  |         | 0.88 (0.53; 1.46) |         |
| Divorced                         | 0.85 (0.40; 1.78)  |         | 1.73 (0.85; 3.51) |         |
| Widowed                          | 1.05 (0.44; 2.49)  |         | 0.41 (0.10; 1.63) |         |

\*OR given just before removing from model
